# Supplementary material for: Fluorescent sensing of homocysteine in urine: Using fluorosurfactant-capped gold nanoparticles and o-Phthaldialdehyde
Source: Royal Society of Chemistry journal article supplement (doi:10.1039/b916511h), 2009-11-02
Supplement: b916511h.pdf [file b916511h.pdf]

## Electronic Supplementary Information

**Fluorescent Sensing of Homocysteine: Using Fluorosurfactant-Capped Gold**

**Nanoparticles for Selective Extraction and *o*-Phthaldialdehyde for Selective**

### Derivatization

Jia-Hui Lin<sup>1</sup>, Chung-Wei Chang<sup>1</sup> and Wei-Lung Tseng<sup>1,2\*</sup>

1. Department of Chemistry, National Sun Yat-sen University, Taiwan
2. National Sun Yat-sen University-Kaohsiung Medical University Joint Research Center, Kaohsiung, Taiwan

**Correspondence:** Dr. Wei-Lung Tseng, Department of Chemistry, National Sun

Yat-sen University, 70, Lien-hai Road, Kaohsiung, Taiwan 804.

**E-mail:** [tsengwl@mail.nsysu.edu.tw](mailto:tsengwl@mail.nsysu.edu.tw)

**Fax:** 011-886-7-3684046.

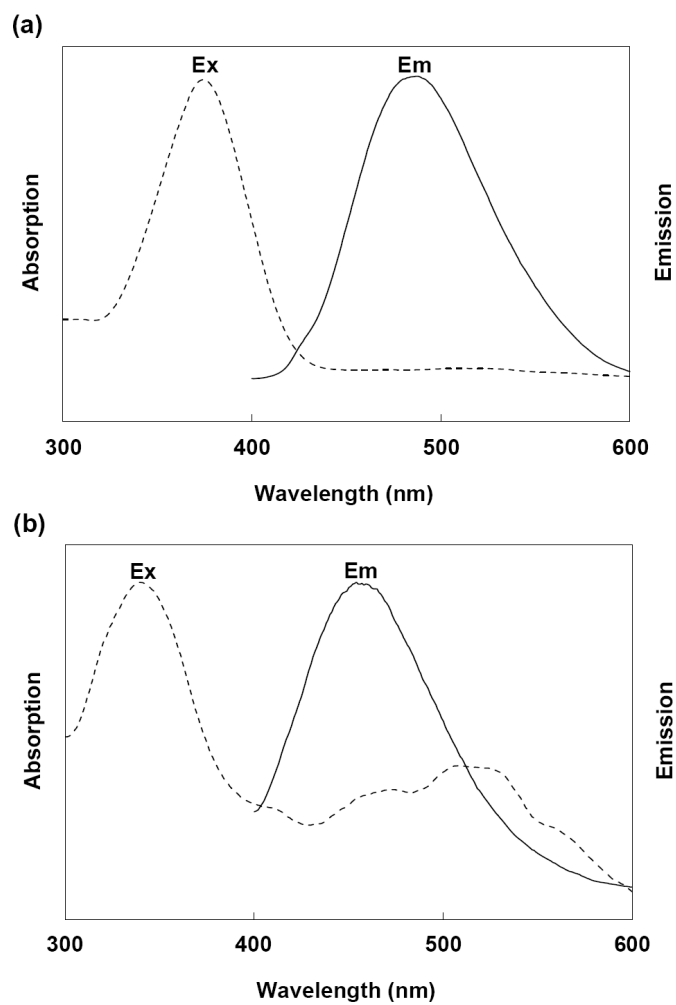

**Fig. S1.** Fluorescence excitation and emission spectra of OPA/2-ME derivatized (a) HCys and (b) Cys

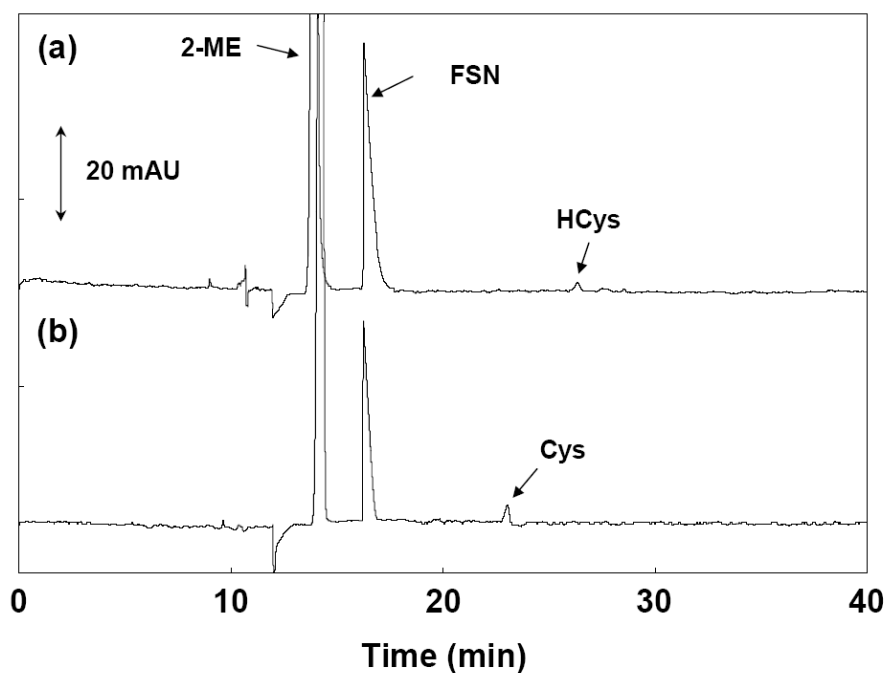

**Fig. S2.** Electrophoregram of released (a) HCys and (b) Cys. The precipitate was collected by the centrifugation of a solution containing 50.0  $\mu\text{M}$  aminothiols and  $1.0\times$  FSN-AuNPs. To liberate aminothiols adsorbed on the NP surface, the precipitate was resuspended in a solution of 0.1 M 2-ME. The released aminothiols were isolated from the precipitate by the centrifugation. The released aminothiols were hydrodynamically injected by raising the capillary inlet 20-cm height for 60 s. A 50-cm capillary (20 cm to detector) is filled with 1.2% v/v PDDAC solution, which is prepared in 5.0 mM phosphate solution at pH 1.0. The detection wavelength is set at 200 nm. All separations were performed at 170 V/cm.

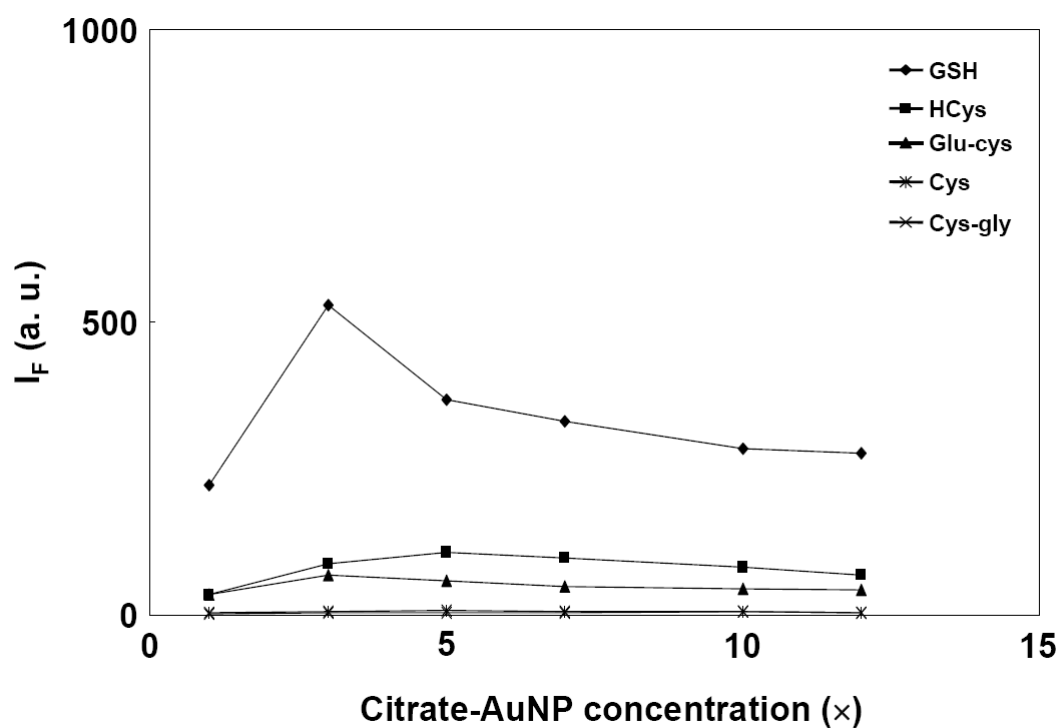

**Fig. s3.** Effect of the concentration of citrate-capped AuNPs on the fluorescence intensity at 485 nm of released aminothiols derivatized with OPA/2-ME. The precipitate was collected by the centrifugation of a solution containing 10.0  $\mu$ M aminothiols and 1.0–12.0 $\times$  citrate-capped AuNPs. The extraction and derivatization conditions are the same as those in Fig. 1. Citrate-capped AuNPs were prepared in 40 mM phosphate solution at pH 13.0. The excitation wavelength was set at 370 nm.

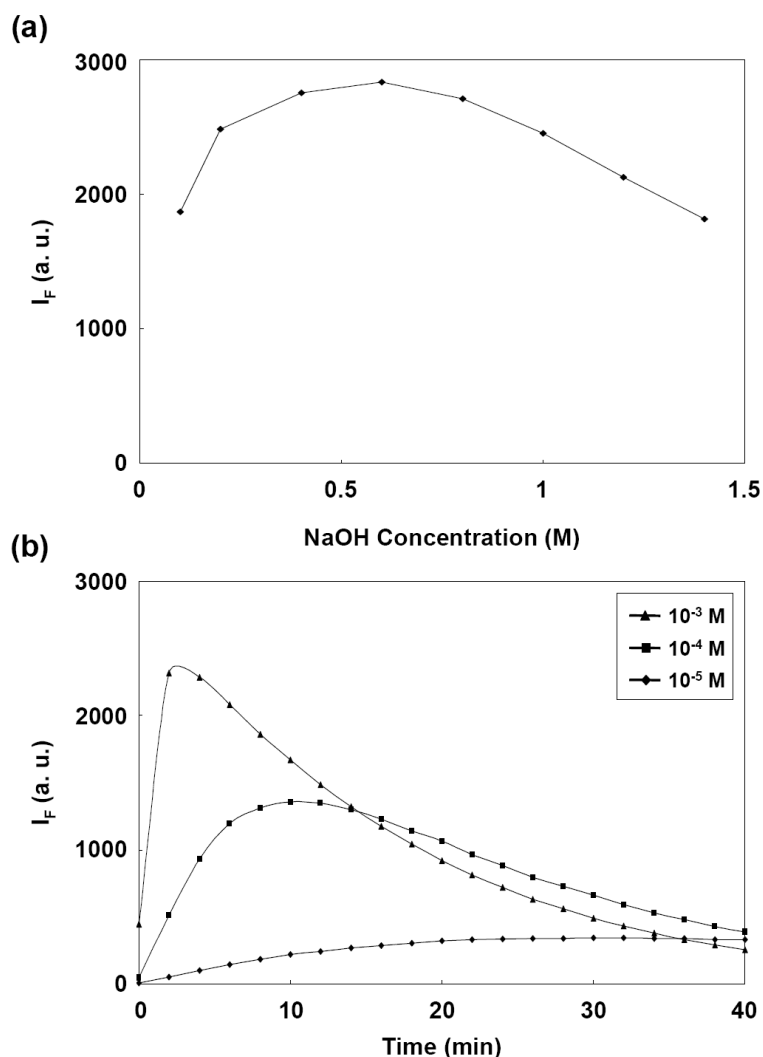

**Fig. s4.** Effect of (a) NaOH and (b) OPA concentration on the derivatization efficiency of released HCys. The precipitate was collected by the centrifugation of a solution containing 10.0  $\mu$ M HCys and 10.0 $\times$  FSN-AuNPs. To liberate HCys adsorbed on the NP surface, the precipitate was resuspended in a solution of 0.1 M 2-ME. The released HCys was isolated from the precipitate by the centrifugation and then derivatized with a solution containing 0.01–1.0 mM OPA and 0.1–1.4 M NaOH. FSN-AuNPs were prepared in 40 mM phosphate solution at pH 13.0. The excitation wavelength was set at 370 nm.
